# Supplementary material for: Improving access to clinical practice guidelines with an interactive graphical interface using an iconic language
Source: Springer Nature journal article supplement (doi:10.1186/1472-6947-14-77), 2014-08-26
Supplement: 12911_2014_841_MOESM2_ESM.pdf [file 12911_2014_841_MOESM2_ESM.pdf]

5 colors

140 central pictograms

2 basic shapes + 35 shape modifiers

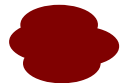

Antecedent

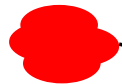

Current state

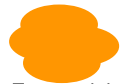

Future risk

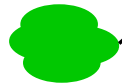

Treatment

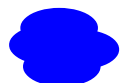

Test

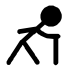

Elderly patient

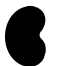

Kidney

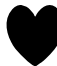

Heart

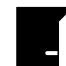

Dose

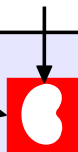

Renal disorder

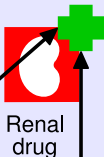

Renal drug

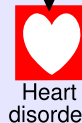

Heart disorder

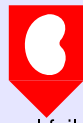

Renal failure

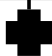

Drug

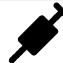

Injectable drug

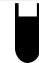

Biology

21 top-right pictograms

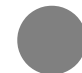

Non-pathological state

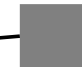

Disease

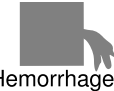

Hemorrhage

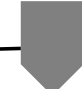

Decrease, failure

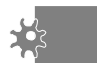

Bacterial infection
