# Supplementary material for: Improving access to clinical practice guidelines with an interactive graphical interface using an iconic language
Source: Springer Nature journal article supplement (doi:10.1186/1472-6947-14-77), 2014-08-26

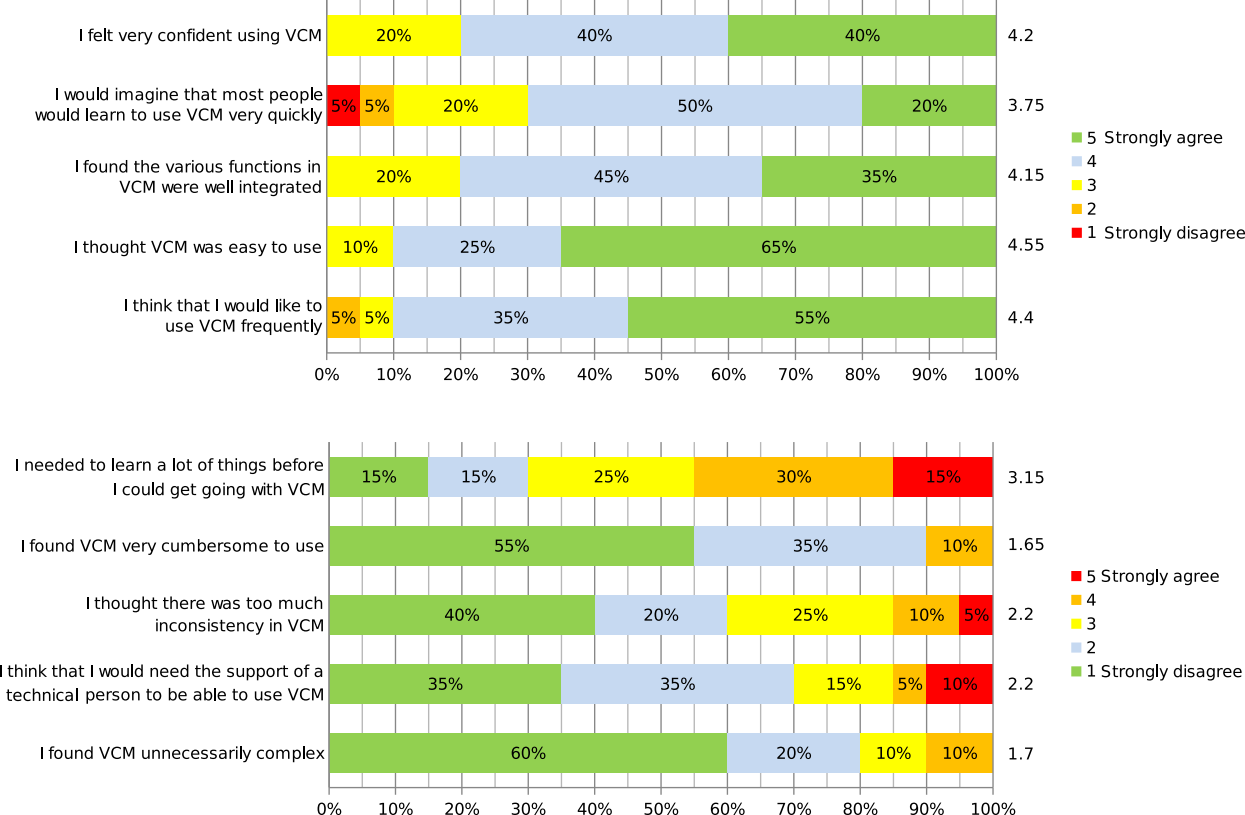

Supplement: 12911_2014_841_MOESM5_ESM.pdf [file 12911_2014_841_MOESM5_ESM.pdf]
